# Supplementary material
Source: Springer Nature journal article supplement (https://www.springermedizin.de/resource/supplementary/12872_2014_741_MOESM6_ESM.pdf/9430780)

Cell Surface Area

% of WT (*ae3*<sup>+/+</sup>)

100

80

60

40

*ae3*<sup>+/+</sup>

*ae3*<sup>-/-</sup>

\*

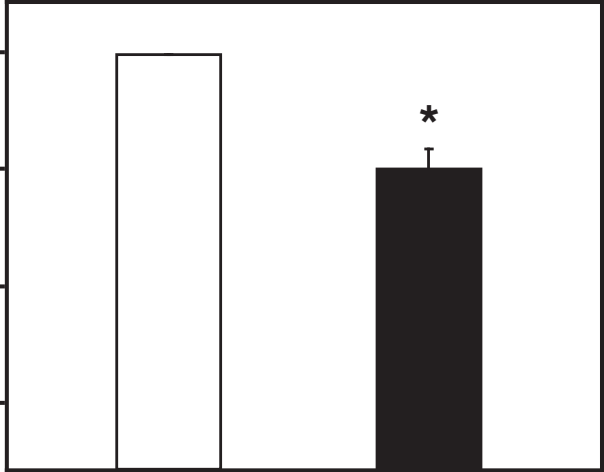

Supplement: MOESM6 [file 9430780]
